# Supplementary material for: Intraluminal pressure patterns in the human colon assessed by high-resolution manometry
Source: PubMed Central journal article supplement (PMC5316981; doi:10.1038/srep41436), 2017-02-20
Supplement: srep41436-s1.pdf [file srep41436-s1.pdf]

**ONLINE SUPPORT FOR: “INTRALUMINAL PRESSURE PATTERNS IN THE HUMAN COLON ASSESSED BY HIGH-RESOLUTION MANOMETRY”**

**Ji-Hong Chen (1,2), Yuanjie Yu (1), Zixian Yang (1), Wen-Zhen Yu (1), Wu Lan Chen (2,3), Hui Yu (2,3), Marie Jeong-Min Kim (2,4), Min Huang (1), Shiyun Tan (1), Hesheng Luo (1), Jianfeng Chen (5), Jiande DZ Chen (5,6) and Jan D. Huizinga (2,1).**

1. Renmin Hospital of Wuhan University, Key Laboratory of Hubei Province for Digestive System Diseases, Wuhan, Hubei, China
2. McMaster University, Farncombe Family Digestive Health Research Institute, Department of Medicine, division of Gastroenterology, Hamilton, Ontario, Canada
3. Honours Biology Pharmacology Coop Program, McMaster University
4. Honours Health Sciences Program, McMaster University
5. MedKinetic Inc., Ningbo, China
6. Johns Hopkins University School of Medicine, Baltimore, USA

TABLE 1S -- PRESSURE PATTERNS AT BASELINE AND RESPONSE TO MEAL IN THE TWO CONTROL GROUPS

|                                          |                               | Patients controls (n=9) |                 | Healthy volunteers (n=5) |                   |
|------------------------------------------|-------------------------------|-------------------------|-----------------|--------------------------|-------------------|
|                                          |                               | Baseline                | Meal            | Baseline                 | Meal              |
| Simultaneous<br>Pressure Waves<br>(SPWs) | Occurrence (/30 min)          | 17.1±13.1 (9)           | 22.9 ±20.2 (9)  | 10.2 ± 4.9 (5)           | 11.1 ± 5.7 (5)    |
|                                          | Maximum rhythmicity (/min)    | 1.4 ± 0.6 (8)           | 2.0 ± 0.7 (7)   | 1.2 ± 0.2 (3)            | 1.7 ± 0.9 (4)     |
|                                          | Average Pressure duration (s) | 16.0 ± 3.4 (8)          | 13.5 ± 3.1 (8)* | 14.6 ± 4.0 (5)           | 14.0 ± 2.2 (5)    |
|                                          | Propagation distance (cm)     | 31.3 ± 8.1 (8)          | 29.0 ± 7.3 (8)  | 34.0 ± 2.5 (5)           | 31.2 ± 7.3 (5)    |
|                                          | Average amplitude (mmHg)      | 15.2 ± 7.7 (9)          | 18.0 ± 12.4 (9) | 13.7 ± 5.1 (5)           | 8.5 ± 4.5 (5)** # |
| Antegrade<br>Pressure waves<br>(APWs)    | Occurrence (/30 min)          | 1.1 ± 1.9 (8)           | 1.1 ± 1.7 (9)   | 0.8 ± 1.4 (5)            | 2.6 ± 3.7 (5)     |
|                                          | Maximum rhythmicity (/min)    | 2.0 (1)                 | 2.8 (0.4) (2)   | (0)                      | 1.0 (1)           |
|                                          | Average Pressure duration (s) | 18.6 ± 6.4 (3)          | 13.0 ± 4.8 (5)  | 8.5 (1)                  | 16.9 ± 3.0 (2)    |

|                                             |                                          |                  |                  |                  |                  |
|---------------------------------------------|------------------------------------------|------------------|------------------|------------------|------------------|
|                                             | Propagation distance (cm)                | 28.9 ± 6.2 (3)   | 30.7 ± 5.9 (5)   | 30.0 ± 8.5 (2)   | 29.4 ± 8.4 (3)   |
|                                             | Average amplitude (mmHg)                 | 15.1 ± 2.2 (3)   | 15.8 ± 5.4 (5)   | 28.5 ± 10.6 (2)  | 23.3 ± 12.8 (3)  |
| Retrograde<br>Pressure Waves<br>(RPWs)      | Occurrence (/30 min)                     | 0.1 ± 0.3 (9)    | 0.2 ± 0.5 (9)    | 1.4 ± 3.1 (5)    | 1.4 ± 2.1 (5)    |
|                                             | Maximum rhythmicity (/min)               | (0)              | (0)              | 0.4 (1)          | (0)              |
|                                             | Average Pressure duration (s)            | 21.9 ± 7.2 (2)   | 14.1 ± 5.0 (3)   | (0)              | 18.9 ± 5.8 (2)   |
|                                             | Propagation distance (cm)                | 26.0 ± 14.1 (2)  | 22.3 ± 12.2 (3)  | (0)              | 28.8 ± 10.3 (2)  |
|                                             | Average amplitude (mmHg)                 | 7.7 ± 3.7 (2)    | 15.9 ± 2.9 (3)   | 32.0 (1)         | 19.2 ± 11.1 (3)  |
| Isolated<br>Pressure<br>Transients          | Maximum amplitude (mmHg)                 | 115.6 ± 42.5 (9) | 109.0 ± 56.4 (9) | 109.4 ± 71.1 (5) | 108.3 ± 19.2 (4) |
|                                             | Percentage of sensors involved           | 36.3 ± 18.1 (9)  | 35.6 ± 15.0 (9)  | 40.0 ± 9.0 (5)   | 45.2 ± 15.0 (5)  |
|                                             | Percentage of time involved              | 71.2 ± 17.8 (9)  | 60.2 ± 23.3 (9)  | 65.5 ± 14.1 (4)  | 68.5 ± 9.1 (4)   |
|                                             | Percentage with amplitude<br><50 mmHg    | 100 ± 0 (9)      | 100 ± 0 (9)      | 99.9 ± 0.1 (5)   | 98.9 ± 2.4 (5)   |
|                                             | Percentage with amplitude<br>50-100 mmHg | 43.4 ± 33.6 (9)  | 38.2 ± 25.2      | 27.8 ± 22.9 (5)  | 21.6 ± 13.1 (5)  |
|                                             | Percentage with amplitude<br>> 100 mmHg  | 17.4 ± 13.0 (9)  | 16.7 ± 12.9 (9)  | 12.3 ± 15.3 (5)  | 4.3 ± 4.2 (5)    |
| High Amplitude<br>Pressure Waves<br>(HAPWs) | Occurrence (%)                           | 0 (0%) (9)       | 2 (22.2%) (9)    | 0 (0%) (5)       | 0 (0%) (5)       |
| Synchronized<br>Haustral<br>Pressure Waves  | Occurrence (%)                           | 1 (11.1%) (9)    | 2 (22.2%) (9)    | 1 (20%) (5)      | 2 (40%) (5)      |

\* p=0.018 (t=3.1, df=7), \*\*p=0.007 (t=5.2, df=4), baseline vs after meal, same subject group (paired samples t test)

# p=0.043 (B=-7.5, 95% CI -0.3 to -14.8) for post meal values in patients controls vs healthy controls (Multiple linear regression, adjusted for baseline values). No statistics were done with n<5.

TABLE 2S -- MOTOR PATTERNS AT BASELINE AND RESPONSE TO MEAL  
 PATIENTS WITH CONSTIPATION, WITH AND WITHOUT RESPONSE TO TREATMENT

| Mean (min-max) (n)             |                               | Constipation Responders (n=8) |                         | Constipation Non Responders (n=3) |                        |
|--------------------------------|-------------------------------|-------------------------------|-------------------------|-----------------------------------|------------------------|
|                                |                               | Baseline                      | Meal                    | Baseline                          | Meal                   |
| Simultaneous<br>Pressure Waves | Occurrence (/30 min)          | 12.5 (5.0-21.0) (8)           | 18.5 (8.5-36.6) (8)     | 5.3 (0.5-14.5) (3)                | 8.3 (0-16.0) (3)       |
|                                | Maximum rhythmicity (/min)    | 1.3 (0.8-2.2) (8)             | 2.1 (1.5-3.0) (7)       | 1.3 (1)                           | 0.6 (0.3-0.9) (2)      |
|                                | Average Pressure duration (s) | 16.5 (9.1-24.0) (8)           | 13.6 (10.4-20.6)<br>(8) | 12.8 (3.2-20.0)(3)                | 18.5 (18.3-18.7) (2)   |
|                                | Propagation distance (cm)     | 33.4 (29.0-36.0) (8)          | 27.6 (20.0-36.0)<br>(8) | 35.2 (33.5-36.0) (3)              | 35.1 (34.2-36.0) (2)   |
|                                | Average amplitude (mmHg)      | 14.4 (7.2-23.4)(8)            | 13.0 (6.4-21.9) (8)     | 15.0 (8.7-20.0) (3)               | 15.3 (11.5-19.0) (2)   |
| Antegrade<br>Pressure waves    | Occurrence (/30 min)          | 0.4 (0-1.4) (8)               | 2.2 (0-10.3) (8)        | 0.9 (0-2.6) (3)                   | 1.8 (0-5.4) (3)        |
|                                | Maximum rhythmicity (/min)    | (0)                           | 1.6 (0.7-2.5) (2)       | (0)                               | (0)                    |
|                                | Average Pressure duration (s) | 14.7 (10.0-17.0)(3)           | 17.2 (14.9-23.0)<br>(5) | 17.1 (1)                          | 21.1 (1)               |
|                                | Propagation distance (cm)     | 16.4 (10.0-20.0) (3)          | 24.5 (10.0-36.0)<br>(5) | 36.0 (1)                          | 36.0 (1)               |
|                                | Average amplitude (mmHg)      | 22.3 (5.0-53.0) (3)           | 23.1 (6.0-35.0) (5)     | 11.5 (1)                          | 16.5 (1)               |
| Retrograde<br>Pressure Waves   | Occurrence (/30 min)          | 0.2 (0-1.2) (8)               | 1.3 (0-5.0) (8)         | 0(3)                              | 0(3)                   |
|                                | Maximum rhythmicity (/min)    | 0                             | 0                       | (0)                               | (0)                    |
|                                | Average Pressure duration (s) | 15.0 (1)                      | 11.7 (6.0-15.0) (4)     | (0)                               | (0)                    |
|                                | Propagation distance (cm)     | 18.0 (1)                      | 19.9 (10.0-30.3)<br>(4) | (0)                               | (0)                    |
|                                | Average amplitude (mmHg)      | 12.0 (1)                      | 26.6 (15.2-36.0)<br>(4) | (0)                               | (0)                    |
| Isolated                       | Maximum amplitude (mmHg)      | 147.3 (60.0-212.0)            | 142.1 (45.0-223.0)      | 110.0 (47.0-149.0) (3)            | 153.0 (92.0-191.0) (3) |

|                                       |                                       |                        |                       |                       |                        |
|---------------------------------------|---------------------------------------|------------------------|-----------------------|-----------------------|------------------------|
| Pressure Transients                   |                                       | (8)                    | (8)                   |                       |                        |
|                                       | Percentage of sensors involved        | 45.1 (23.0-63.0) (8)   | 49.9 (23.0-76.0) (8)  | 22.4 (11.0-32.0) (3)  | 29.9 (18.0-36.0) (3)   |
|                                       | Percentage of time involved           | 76.5 (54.0-95.0) (8)   | 74.2 (62.0-85.0) (8)  | 61.2 (35.0-94.0) (3)  | 67.1 (41.8-88.0) (3)   |
|                                       | Percentage with amplitude <50 mmHg    | 100.0 (100.0-100.0)(8) | 99.2 (96.0-100.0) (8) | 88.2 (66.7-100.0) (3) | 100.0 (100.0-100.0)(3) |
|                                       | Percentage with amplitude 50-100 mmHg | 53.1 (20.0-80.7) (8)   | 57.0 (7.5-83.7) (8)   | 43.6 (35.0-48.0) (3)  | 36.5 (15.5-67.0) (3)   |
|                                       | Percentage with amplitude > 100 mmHg  | 25.2 (0-47.0) (8)      | 23.8 (0-40.0) (8)     | 11.4 (0-24.0) (3)     | 20.2 (0-42.0) (3)      |
| High Amplitude Pressure Waves (HAPWs) | Occurrence (%)                        | 1 (12.5%) (8)          | 1 (12.5%) (8)         | 0(0%) (2)             | 0(0%) (2)              |
| Synchronized Haustral Pressure Waves  | Occurrence (%)                        | 0 (0%) (8)             | 6 (75.0%) (8)         | 0(0%) (2)             | 0(0%) (2)              |

No statistical comparisons were performed because of low sample size of non-responders. Four of the 15 patients were not available for follow up.
